# Supplementary material
Source: PubMed Central journal article supplement (PMC11148879)
Supplement: NIHMS1993098-supplement-Supplement_1.pdf [file NIHMS1993098-supplement-Supplement_1.pdf]

## APPENDIX

**Exhibit A-1.** Geographic distribution of mRNA vaccine administration among Medicare beneficiaries measured at the county level, overall and by U.S. regions

**Exhibit A-2.** Predicted probability of Pfizer-BioNTech for first dose of mRNA vaccine among Medicare beneficiaries (January 1, 2021 and July 31, 2021) and booster dose of mRNA vaccine among Medicare beneficiaries (August 1, 2021 and April 31, 2022)

**Exhibit A-3.** Odds-ratio of Pfizer-BioNTech for first dose of mRNA vaccine among Medicare beneficiaries (January 1, 2021 and July 31, 2021) and booster dose of mRNA vaccine among Medicare beneficiaries (August 1, 2021 and April 31, 2022)

**Exhibit A-4.** Description of COVID-19 vaccine coverage in the study sample relative to CDC vaccine administration data for individuals 65 years and older

**Exhibit A-5.** Association between receiving the Pfizer-BioNTech vs Moderna mRNA vaccine as the first COVID-10 vaccine dose and urbanicity by percent vaccine capture

## Data

This project was funded as two administrative supplements to a large cooperative agreement (U54AG063546) to examine how COVID has affected the older adult population, particularly those living with dementia. We established a public-private partnership between CVS Health, Walgreens, and academic institutions funded by the National Institute on Aging (NIA) to link customer data from CVS Health and Walgreens to Medicare enrollment and claims information, which resulted in a cohort of over 38 million individuals. A comprehensive overview of the data source and linkage, as well as how to access the linked data, is described in Hayes et al (1).

Our data is at the patient level, and it is possible that a patient may have received Pfizer vaccines for their primary series and Moderna for their booster dose(s), or vice versa. However, 94.65% of beneficiaries received a Pfizer vaccine for both their first dose and booster dose. Given the small percentage of beneficiaries who switched vaccine products between their first dose and booster dose, we did not require that individuals received the same vaccine product for both the first dose and booster dose.

A public GitHub repository for this study was created and contains all statistical code and 3 county-level datasets ([t.ly/NvbCD](https://t.ly/NvbCD)). Due to data privacy and use requirements, small cell sizes and other information (e.g., file paths) have been redacted. As such, there are small differences in the data source used for the study and public use files. Any inquiries about these files should be directed to the corresponding author.

## Results

**Exhibit A-1.** Geographic distribution of mRNA vaccine administration among Medicare beneficiaries measured at the county level, overall and by U.S. regions

|                                                                           | Overall            | Northeast          | Midwest            | South              | West               |
|---------------------------------------------------------------------------|--------------------|--------------------|--------------------|--------------------|--------------------|
| <b>Dose 1</b>                                                             |                    |                    |                    |                    |                    |
| Number of counties                                                        | 3,139              | 217                | 1,055              | 1,420              | 447                |
| Number of Medicare beneficiaries vaccinated across counties               | 14,448,485         | 3,075,797          | 3,620,658          | 4,938,507          | 2,813,523          |
| Number of Medicare beneficiaries vaccinated across counties, median (IQR) | 800<br>(2,706)     | 5,161<br>(14,843)  | 576<br>(1,936)     | 876<br>(2,278)     | 346<br>(2,555)     |
| % Pfizer, median (IQR)                                                    | 48.38%<br>(30.96%) | 53.56%<br>(20.39%) | 49.46%<br>(34.02%) | 45.45%<br>(29.78%) | 51.73%<br>(33.39%) |
| <b>Booster Dose</b>                                                       |                    |                    |                    |                    |                    |
| Number of counties                                                        | 3,140              | 217                | 1,055              | 1,422              | 446                |
| Number of Medicare beneficiaries vaccinated across counties               | 19,151,132         | 4,167,652          | 4,178,690          | 7,105,985          | 3,698,805          |
| Number of Medicare beneficiaries vaccinated across counties, median (IQR) | 978<br>(3,353)     | 6,505<br>(21,495)  | 636<br>(2,155)     | 1,044<br>(2,926)   | 405<br>(3,138)     |
| % Pfizer, median (IQR)                                                    | 42.61%<br>(28.17%) | 52.45%<br>(17.23%) | 44.19%<br>(24.92%) | 39.16%<br>(31.04%) | 39.99%<br>(27.50%) |

**Exhibit A-2.** Predicted probability of Pfizer-BioNTech for first dose of mRNA vaccine among Medicare beneficiaries (January 1, 2021 and July 31, 2021) and booster dose of mRNA vaccine among Medicare beneficiaries (August 1, 2021 and April 31, 2022)

| Month Year             | Large Central Metro |           | Large Fringe Metro |           | Medium Metro |           | Small Metro |           | Micropolitan |           | Non-Core   |           |
|------------------------|---------------------|-----------|--------------------|-----------|--------------|-----------|-------------|-----------|--------------|-----------|------------|-----------|
|                        | Pred. Prob          | 95% CI    | Pred. Prob         | 95% CI    | Pred. Prob   | 95% CI    | Pred. Prob  | 95% CI    | Pred. Prob   | 95% CI    | Pred. Prob | 95% CI    |
| <b>A. First Dose</b>   |                     |           |                    |           |              |           |             |           |              |           |            |           |
| January 2021           | 62.3%               | 62.2-62.3 | 58.3%              | 58.2-58.4 | 54.1%        | 54.0-54.2 | 51.3%       | 51.1-51.4 | 48.8%        | 48.6-49.0 | 43.9%      | 43.7-44.1 |
| February 2021          | 54.0%               | 53.9-54.1 | 50.4%              | 50.3-50.4 | 46.5%        | 46.4-46.6 | 44.0%       | 43.8-44.1 | 38.3%        | 38.1-38.5 | 35.1%      | 34.9-35.3 |
| March 2021             | 62.7%               | 62.6-62.8 | 59.1%              | 59.0-59.2 | 60.1%        | 60.0-60.2 | 54.1%       | 63.9-54.3 | 45.4%        | 45.1-45.6 | 39.8%      | 39.5-40.1 |
| April 2021             | 62.7%               | 62.6-62.9 | 59.0%              | 58.8-59.1 | 60.0%        | 59.8-60.2 | 54.9%       | 54.5-55.2 | 46.1%        | 45.7-46.5 | 43.3%      | 42.8-43.8 |
| May 2021               | 63.0%               | 62.8-63.3 | 57.1%              | 56.8-57.3 | 58.5%        | 58.3-58.8 | 55.7%       | 55.2-56.1 | 46.7%        | 46.2-47.2 | 42.4%      | 41.8-43.1 |
| June 2021              | 70.8%               | 70.4-71.1 | 65.8%              | 65.4-66.2 | 65.1%        | 64.7-65.5 | 63.3%       | 62.6-63.9 | 53.9%        | 53.1-54.6 | 49.6%      | 48.6-50.5 |
| July 2021              | 71.3%               | 71.0-71.6 | 66.1%              | 65.7-66.4 | 64.8%        | 64.4-65.1 | 62.3%       | 61.8-62.9 | 52.6%        | 52.0-53.2 | 49.1%      | 48.3-49.9 |
| <b>B. Booster Dose</b> |                     |           |                    |           |              |           |             |           |              |           |            |           |
| August 2021            | 56.9%               | 56.6-57.1 | 58.3%              | 58.1-58.5 | 52.5%        | 52.2-52.7 | 53.0%       | 52.6-53.5 | 47.8%        | 47.3-48.4 | 38.9%      | 38.2-39.7 |
| September 2021         | 88.6%               | 88.5-88.6 | 88.9%              | 88.8-89.0 | 89.2%        | 89.1-89.3 | 89.0%       | 88.9-89.1 | 87.5%        | 87.3-87.7 | 89.2%      | 82.6-83.2 |
| October 2021           | 61.9%               | 61.9-62.0 | 59.0%              | 58.9-59.1 | 56.6%        | 56.5-56.7 | 55.3%       | 55.2-55.4 | 46.5%        | 46.7-47.0 | 41.1%      | 40.9-41.3 |
| November 2021          | 43.9%               | 43.8-44.0 | 40.3%              | 40.2-40.4 | 38.3%        | 38.2-38.4 | 36.5%       | 36.3-36.6 | 30.3%        | 30.2-30.5 | 26.7%      | 26.5-26.9 |
| December 2021          | 53.2%               | 53.1-53.4 | 48.8%              | 48.7-48.9 | 46.9%        | 46.8-47.1 | 44.0%       | 43.8-44.2 | 36.4%        | 36.2-36.6 | 32.6%      | 32.3-32.9 |
| January 2022           | 56.5%               | 56.3-56.7 | 52.3%              | 52.2-52.5 | 51.3%        | 51.1-51.5 | 49.3%       | 49.0-49.6 | 40.2%        | 39.9-40.6 | 36.8%      | 36.3-37.3 |
| February 2022          | 59.4%               | 59.1-59.8 | 54.9%              | 54.5-55.3 | 54.0%        | 53.6-54.5 | 50.6%       | 49.9-51.3 | 40.4%        | 39.6-41.2 | 37.9%      | 36.9-38.9 |
| March 2022             | 55.0%               | 54.6-55.4 | 52.3%              | 51.9-52.7 | 50.4%        | 49.9-51.0 | 50.2%       | 49.4-51.1 | 40.9%        | 40.0-41.8 | 37.9%      | 36.6-39.1 |
| April 2022             | 51.4%               | 51.2-51.7 | 49.7%              | 49.5-50.0 | 48.5%        | 48.2-48.8 | 47.9%       | 47.4-48.4 | 37.1%        | 36.5-37.7 | 30.7%      | 30.0-31.5 |

**Exhibit A-3.** Odds-ratio of Pfizer-BioNTech for first dose of mRNA vaccine among Medicare beneficiaries (January 1, 2021 and July 31, 2021) and booster dose of mRNA vaccine among Medicare beneficiaries (August 1, 2021 and April 31, 2022)

|                     | Odds-ratio | 95% Confidence Interval |
|---------------------|------------|-------------------------|
| <b>First Dose</b>   |            |                         |
| Large Central Metro | reference  | reference               |
| Large Fringe Metro  | 0.843      | 0.841-0.846             |
| Medium Metro        | 0.767      | 0.765-0.770             |
| Small Metro         | 0.669      | 0.666-0.671             |
| Micropolitan        | 0.540      | 0.537-0.542             |
| Non-Core            | 0.455      | 0.452-0.457             |
| <b>Booster Dose</b> |            |                         |
| Large Central Metro | reference  | reference               |
| Large Fringe Metro  | 0.880      | 0.878-0.882             |
| Medium Metro        | 0.807      | 0.805-0.810             |
| Small Metro         | 0.746      | 0.743-0.748             |
| Micropolitan        | 0.530      | 0.528-0.533             |
| Non-Core            | 0.424      | 0.421-0.426             |

## Sensitivity analyses

A limitation of our study was our inability to capture COVID-19 vaccinations that were not billed to Medicare or administered at a CVS Health or Walgreens pharmacy. Thus, data were missing vaccines administered for free or not recorded in administrative data sources (e.g., those administered at mass vaccination clinics) (2). We assessed the extent of missing vaccines in our data source and the impact of missing vaccines on our inferences. We cannot, however, distinguish whether missing data differs by vaccine product (Pfizer-BioNTech versus Moderna).

We obtained county-level data on all first doses administered to individuals 65 years and older published by the U.S. Centers for Disease Control and Prevention (CDC) (3). The CDC's data includes vaccination counts among all individuals ages 65 years and older covered by Medicare as well as those not enrolled in Medicare.

For every U.S. county, we calculated the percentage of vaccines we captured relative to the CDC data, and categorized counties according to the extent of missingness: low capture (< 20.0% of CDC vaccinations), medium capture (20% to < 50% of CDC vaccinations), and high capture (> 50% of CDC vaccinations). While our data captures mRNA vaccinations among Medicare beneficiaries only, the CDC county-level data includes both mRNA and Johnson & Johnson vaccinations as well as vaccinations among non-Medicare beneficiaries 65 years and older. Therefore, the degree of missingness in our study's data will be overestimated.

We stratified the primary analysis by individuals living in counties with low, medium, and high vaccine capture to assess the robustness of the primary analysis by degree of data completeness. We also described differences in the extent of missingness by urbanicity.

Across all U.S. counties, our data's measure of mRNA vaccine administrations captured median 36% (Interquartile range=27%-46%) of dose 1 vaccinations reported by the CDC (Exhibit A-1). The extent of missingness varied slightly by urbanicity, with generally greater vaccine capture in urban areas than rural areas. When stratified by low, medium, and high vaccine capture, we replicated the primary analysis – individuals living in more urban counties were more likely to receive Pfizer while those living in more rural counties were more likely to receive Moderna (Exhibit A-2). As the CDC denominator includes Janssen vaccinations and non-Medicare beneficiaries, we underestimate vaccine coverage for our data source (1).

**Exhibit A-4.** Description of COVID-19 vaccine coverage in the study sample relative to CDC vaccine administration data for individuals 65 years and older

|                                                            | Overall <sup>3</sup> | Low vaccine capture<br>(< 20% of CDC<br>vaccinations <sup>1</sup> ) | Medium vaccine<br>capture<br>(20%-50% of CDC<br>vaccinations <sup>1</sup> ) | High vaccine capture<br>(> 50% of CDC<br>vaccinations <sup>1</sup> ) |
|------------------------------------------------------------|----------------------|---------------------------------------------------------------------|-----------------------------------------------------------------------------|----------------------------------------------------------------------|
| N individuals                                              | 12,464,850           | 1,250,565                                                           | 9,152,114                                                                   | 2,062,171                                                            |
| N counties                                                 | 2,648                | 1,226                                                               | 1,202                                                                       | 220                                                                  |
| Proportion of vaccine capture at county level <sup>1</sup> |                      |                                                                     |                                                                             |                                                                      |
| Median (IQR)                                               | 0.36 (0.27-0.46)     | 0.16 (0.13-0.17)                                                    | 0.35(0.28-0.41)                                                             | 0.54(0.53-0.57)                                                      |
| Urbanicity <sup>2</sup> , number of individuals (%)        |                      |                                                                     |                                                                             |                                                                      |
| Large central metro                                        | 3,387,150 (27.17%)   | 305,772 (24.45%)                                                    | 2,702,620 (29.53%)                                                          | 378,758 (18.37%)                                                     |
| Large fringe metro                                         | 3,725,508 (29.89%)   | 212,355 (16.98%)                                                    | 2,558,742 (27.96%)                                                          | 954,411 (46.28%)                                                     |
| Medium metro                                               | 2,851,564 (22.88%)   | 243,756 (19.49%)                                                    | 2,153,225 (23.53%)                                                          | 454,583 (22.04%)                                                     |
| Small metro                                                | 1,094,573 (8.78%)    | 157,456 (12.59%)                                                    | 828,240 (9.05%)                                                             | 108,877 (5.28%)                                                      |
| Micropolitan                                               | 894,005 (7.17%)      | 179,571 (14.36%)                                                    | 610,085 (6.67%)                                                             | 104,349 (5.06%)                                                      |
| Non-core                                                   | 512,050 (4.11%)      | 151,655 (12.13%)                                                    | 299,202 (3.27%)                                                             | 61,193 (2.97%)                                                       |

Notes: IQR=interquartile range; CDC=Centers for Disease Control and Prevention; Column percentages are reported.

<sup>1</sup> To estimate percent vaccine coverage, and approximately determine the extent of missing data in our data source, we divided the number of mRNA vaccines captured in our data source by the total number of first doses administered to individuals 65 years and older data published by the Centers for Disease Control and Prevention (CDC) (3) . As the CDC denominator is not restricted to Medicare beneficiaries and includes all first doses (i.e., the Janssen vaccine), these likely reflect underestimates of vaccine capture.

<sup>2</sup> Urbanicity was defined using the National Center for Health Statistics (NCHS) Urban-Rural Classification Scheme for Counties (4). Non-core counties are defined as nonmetropolitan counties that are not in a micropolitan area statistical area.

<sup>3</sup> Overall column includes individuals 65+ years of age who belong to the county that did not have missing CDC county vaccination numbers for Dose 1.

**Exhibit A-5.** Association between receiving the Pfizer-BioNTech vs Moderna mRNA vaccine as the first COVID-10 vaccine dose and urbanicity by percent vaccine capture

|                                 | Low vaccine capture<br>( < 20% of CDC vaccinations <sup>1</sup> ) |                     | Medium vaccine capture<br>(20%-50% of CDC vaccinations <sup>1</sup> ) |                     | High vaccine capture<br>( > 50% of CDC vaccinations <sup>1</sup> ) |                     |
|---------------------------------|-------------------------------------------------------------------|---------------------|-----------------------------------------------------------------------|---------------------|--------------------------------------------------------------------|---------------------|
|                                 | Predicted Probability of Pfizer                                   | OR (95%CI)          | Predicted Probability of Pfizer                                       | OR (95%CI)          | Predicted Probability Of Pfizer                                    | OR (95%CI)          |
| Urbanicity <sup>2</sup> , n (%) |                                                                   |                     |                                                                       |                     |                                                                    |                     |
| Large central metro             | 0.647                                                             | ref                 | 0.576                                                                 | ref                 | 0.639                                                              | ref                 |
| Large fringe metro              | 0.570                                                             | 0.725 (0.717-0.733) | 0.539                                                                 | 0.862 (0.859-0.865) | 0.597                                                              | 0.837 (0.831-0.844) |
| Medium metro                    | 0.550                                                             | 0.667 (0.660-0.674) | 0.528                                                                 | 0.822 (0.820-0.825) | 0.594                                                              | 0.828(0.821-0.836)  |
| Small metro                     | 0.493                                                             | 0.531 (0.524-0.537) | 0.485                                                                 | 0.693 (0.690-0.696) | 0.600                                                              | 0.847 (0.835-0.859) |
| Micropolitan                    | 0.479                                                             | 0.502 (0.493-0.508) | 0.439                                                                 | 0.577 (0.574-0.580) | 0.452                                                              | 0.466 (0.459-0.472) |
| Non-core                        | 0.436                                                             | 0.423 (0.418-0.429) | 0.398                                                                 | 0.483 (0.483-0.491) | 0.284                                                              | 0.224 (0.220-0.228) |

Notes: IQR=interquartile range; CDC=Centers for Disease Control and Prevention; OR=Odds Ratio; CI=confidence interval

<sup>1</sup> To estimate percent vaccine coverage, and approximately determine the extent of missing data in our data source, we divided the number of mRNA vaccines captured in our data source by the total number of first doses administered to individuals 65 years and older data published by the Centers for Disease Control and Prevention (CDC) (3). As the CDC denominator is not restricted to Medicare beneficiaries and includes all first doses (i.e., the Janssen vaccine), these likely reflect underestimates of vaccine capture.

<sup>2</sup> Urbanicity was defined using the National Center for Health Statistics (NCHS) Urban-Rural Classification Scheme for Counties (4). Non-core counties are defined as nonmetropolitan counties that are not in a micropolitan area statistical area.



## References

1. Hayes KN, Harris DA, Zullo AR, Djibo DA, Smith-Ray RL, Taitel MS, et al. Data Resource Profile: COVid VAXines Effects on the Aged (COVVAXAGE). *Int J Popl Data Sci.* 2023. [Accepted]
2. Centers for Medicare & Medicaid Services. Assessing the Completeness of Medicare Claims Data for Measuring COVID-19 Vaccine Administration.
3. Centers for Disease Control and Prevention. COVID-19 Vaccinations by County [Internet]. 2023 [cited 2023 May 25]. Available from: <https://covid.cdc.gov/covid-data-tracker>
4. National Center for Health Statistics. NCHS Urban-Rural Classification Scheme for Counties [Internet]. 2017 [cited 2023 May 25]. Available from: [https://www.cdc.gov/nchs/data\\_access/urban\\_rural.htm](https://www.cdc.gov/nchs/data_access/urban_rural.htm)
